# Supplementary material for: Fungal spores overwhelm biogenic organic aerosols in a midlatitudinal forest
Source: Copernicus journal article supplement (doi:10.5194/acp-16-7497-2016), 2016-06-16
Supplement: Supplementary file 1 [file acp-16-7497-2016-supplement.pdf]

Supplement of Atmos. Chem. Phys., 16, 7497–7506, 2016  
<http://www.atmos-chem-phys.net/16/7497/2016/>  
doi:10.5194/acp-16-7497-2016-supplement  
© Author(s) 2016. CC Attribution 3.0 License.

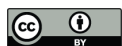

*Supplement of*

## **Fungal spores overwhelm biogenic organic aerosols in a midlatitudinal forest**

**Chunmao Zhu et al.**

*Correspondence to:* Kimitaka Kawamura ([kkawamura@isc.chubu.ac.jp](mailto:kkawamura@isc.chubu.ac.jp)) and Chunmao Zhu ([chmzhu@jamstec.go.jp](mailto:chmzhu@jamstec.go.jp))

The copyright of individual parts of the supplement might differ from the CC-BY 3.0 licence.

(a) Daytime (07:00-18:00)

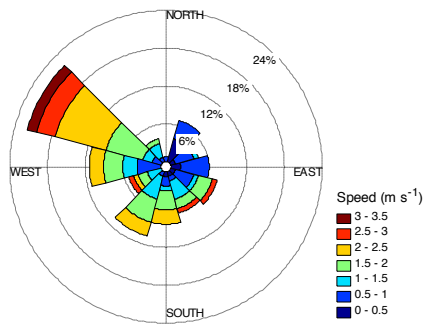

(b) Nighttime (19:00-06:00)

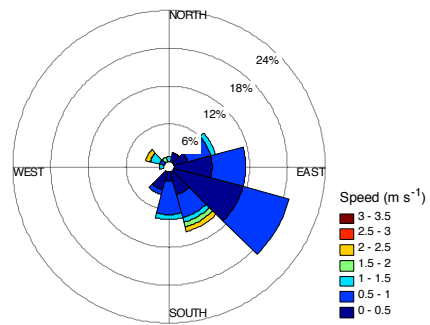

6  
7 Figure S1. Frequency distributions of wind direction and wind speed over August 20–30, 2010  
8 at Wakayama forest in (a) the daytime and (b) the nighttime. The wind direction and wind  
9 speed data were obtained at Shimizu observation site from Japan Meteorological Agency.  
10
